# Supplementary material for: Socio-economic vulnerabilities and HIV: Drivers of transactional sex among female bar workers in Yaoundé, Cameroon
Source: PLoS One. 2018 Jun 18;13(6):e0198853. doi: 10.1371/journal.pone.0198853 (PMC6005536; doi:10.1371/journal.pone.0198853)
Supplement: S1 Study Dataset — (XLS) [file pone.0198853.s002.xls]

## Sheet: Sheet1
ptID	age	mstatus	educ	monthinc	otherinc	livingarran	ppleliving	workduration	totmensex	agefirstsex	currsexpart	sexmoney	sexcust	nbercustsex	sexrelation	durasexrel	lastimesex	condomlastsex	drinkalcol	daysdrinkalcol	unprotectsex	evertesthiv	reasons_notest	otherreasons	lastimetest	sti_sympt	othersympt	sti_diagn	sti_typediagn	sti_other	sti_treat	othertreat	buttocks	sexcomments	telnumber	starring	intrusquest	physcontact	dating	otherbehav	expsexharr	abused	freqabused	lastsexharr	feelsexharr	otherfeeling	seeksupport	othersupport	depressed
92	32	1	2	1	0	1	0	1	2	15	3	1	0	0	0	0	2	0	1	5	1	1	0		2	1		0	0		0		1	0	1	1	1	0	1		1	1	2	1	1		4		5
205	26	1	1	1	0	1	0	2	2	18	3	1	1	1	1	1	1	0	1	5	0	1	0		2	0		0	0		0		1	1	1	1	1	1	1		1	1	3	1	5		1		1
117	26	1	1	1	0	1	0	1	1	20	2	0	0	0	0	0	4	1	1	7	0	1	0		2	0		0	0		0		0	1	0	0	0	0	1		1	1	0	2	3		1		6
249	28	1	1	1	0	1	0	2	1	16	2	0	0	0	0	0	1	0	1	4	0	1	0		2	1		1	1		1		1	1	1	1	1	0	1		1	1	2	1	5		1		4
41	25	1	3	2	1	1	0	1	1	20	2	0	0	0	0	0	1	0	1	3	0	1	0		1	4		0	1		1		1	1	1	1	0	0	1		1	1	0	1	2		3		2
203	41	1	1	1	0	1	0	2	3	13	3	0	0	0	0	0	1	0	1	6	1	1	0		3	2		1	3		4		0	1	1	1	1	0	0		1	1	1	2	3		5		5
349	32	1	3	2	1	2	0	2	1	19	2	0	0	0	0	0	2	0	1	3	0	1	0		2	1		0	0		0		0	1	1	0	0	0	1		1	1	3	2	2		1		6
316	32	1	2	2	0	1	0	1	1	18	3	0	0	0	0	0	1	0	1	5	0	0	4		0	1		1	1		3		1	1	1	1	0	1	0		1	1	1	2	1		1		5
119	30	1	2	1	0	1	0	1	1	18	2	0	0	0	0	0	1	1	1	7	0	1	0		2	3		1	1		1		1	1	1	1	1	0	1		1	1	0	2	1		1		6
310	28	1	1	2	0	1	0	1	1	19	2	0	0	0	0	0	1	0	0	0	0	1	0		1	1		0	0		0		1	1	1	1	1	0	1		1	0	0	1	1		1		4
392	40	1	1	1	0	1	0	2	2	18	2	1	0	0	0	0	1	0	1	5	1	1	0		2	1		0	0		0		1	1	1	1	1	1	1		1	1	2	1	5		4		3
109	28	1	2	1	0	1	0	1	1	14	2	1	0	0	0	0	1	0	1	3	0	1	0		1	0		0	0		0		0	1	0	0	1	0	0		1	1	0	1	2		3		6
35	26	1	1	1	1	1	0	1	1	15	2	0	0	0	0	0	1	0	0	0	0	1	0		1	1		1	1		1		0	0	0	1	0	0	0		1	1	2	1	5		1		2
113	38	3	2	1	1	1	0	1	1	24	1	0	0	0	0	0	4	0	0	0	0	1	0		1	0		0	0		0		0	0	1	0	0	0	0		1	1	1	2	1		1		6
66	38	1	2	1	0	1	0	2	3	14	1	0	0		0	0	4	1	1	3	0	1	0		3	0		0	0		0		0	1	1	0	0	0	1		1	1	3	1	5		1		6
32	22	1	4	1	0	1	0	1	1	21	1	0	0	0	0	0	1	1	1	2	0	1	0		1	1		0	0		0		0	0	1	1	0	0	0		1	1	1	1	5		4		6
168	30	2	2	1	0	1	0	1	1	18	2	1	0	0	0	0	1	0	1	3	1	1	0		1	1		0	0		0		1	1	1	1	1	0	1		1	1	3	1	1		1		5
13	25	1	4	1	0	1	0	1	1	19	2	0	0	0	0	0	3	0	1	3	0	1	0		3	0		0	0		0		0	1	1	1	0	0	1		1	1	0	2	2		1		4
315	31	1	1	2	0	1	0	1	1	18	2	0	0	0	0	0	1	0	0	0	0	1	0		1	0		0	0		0		1	1	1	1	1	0	0		1	1		1	1		1		4
324	31	1	2	2	0	1	0	2	3	16	1	1	0	0	0	0	4	1	0	0	0	1	0		1	1		1	1		1		1	1	1	0	1	1	1		1	1	3	1	5		1		6
409	24	1	2	1	0	1	0	2	1	17	2	0	0	0	0	0	1	0	1	4	0	1	0		3	4		0	0		0		1	0	1	1	1	0	1		1	1	2	1	1		4		2
356	26	1	3	1	0	1	0	1	1	19	2	0	0	0	0	0	4	1	1	3	0	1	0		1	1		0	0		0		1	1	1	1	1	0	1		1	1	2	1	5		1		4
322	27	1	2	2	0	1	0	2	3	17	1	1	1	1	1	1	2	1	1	6	0	1	0		1	1		1	1		1		1	1	1	0	1	0	1		1	1	3	1	5		1		5
198	27	1	2	1	0	1	0	1	1	17	2	0	0	0	0	0	1	0	1	2	0	1	0		2	1		0	0		0		1	1	1	1	1	0	1		1	1	4	1	5		0	Friend	1
229	35	1	2	1	0	1	0	1	3	17	2	0	0	0	0	0	2	0	0	0	0	1	0		3	1		0	0		0		0	1	1	1	0	0	1		1	0	0	1	5		1		3
236	32	1	2	1	0	1	0	1	1	19	1	0	0	0	0	0	4	1	1	6	0	1	0		3	1		0	0		0		0	1	1	0	1	0	1		1	1	1	1	5		1		4
304	21	1	2	2	0	1	0	1	1	18	2	0	0	0	0	0	1	1	0	0	0	1	0		1	0		1	2		1		0	1	1	0	0	0	1		1	1	1	1	5		1		6
4	24	1	3	1	0	1	0	1	1	24	2	0	0	0	0	0	1	0	1	7	1	1	0		1	1		1	2		3		0	1	1	1	0	0	1		1	1	3	1	1		5		4
165	29	1	2	2	0	1	0	2	2	15	2	1	1	1	1	2	1	0	0	0	0	1	0		3	0		0	0		0		1	1	1	1	0	0	1		1	1	3	2	2		1		2
211	36	3	1	1	1	1	0	1	1	15	3	0	1	2	1	2	1	0	1	4	0	1	0		1	1		1	1		1		1	1	1	1	1	0	1		1	1	2	1	1		3		2
192	26	1	4	2	1	1	0	1	1	15	2	1	0	0	0	0	1	0	1	3	1	1	0		1	1		0	0		0		0	1	0	1	0	1	1		1	1	0	2	5		3		4
141	45	1	2	2	0	1	0	1	1	15	1	0	0	0	0	0	4	1	1	3	0	0	5		0	1		1	1		1		1	1	0	1	0	0	1		1	1	3	1	5		1		5
28	28	1	1	1	0	1	0	2	1	17	2	0	1	2	1	2	1	0	0	0	0	1	0		1	2		1	1		3		0	1	0	0	0	0	0		1	1	3	1	1		2		6
225	23	1	2	1	0	1	0	1	1	20	1	0	0	0	0	0	4	1	1	7	0	1	0		1	1		0	0		0		1	1	1	1	1	1	1		1	1	3	1	5		1		5
361	31	1	3	1	0	1	0	2	3	15	3	1	1	2	1	1	1	0	1	7	1	1	0		2	4		1	1		5		1	1	1	1	1	0	1		1	1	3	1	5		1		6
267	29	1	2	2	0	1	0	1	1	17	2	0	1	1	0	0	2	0	0	0	0	0	4		0	1		0	0		0		1	1	1	1	0	0	0		1	1	3	1	1		1		6
342	29	1	3	2	1	1	0	1	1	19	2	1	0	0	0	0	1	1	0	0	0	1	0		1	0		0	0		0		1	0	1	0	0	1	0		1	1	3	2	5		1		6
93	33	1	2	1	0	1	0	1	2	15	2	0	0	0	0	0	1	0	1	3	0	1	0		1	0		0	0		0		1	1	1	1	1	0	1		1	1	2	1	1		1		5
188	23	1	2	1	0	1	0	1	1	17	2	0	0	0	0	0	4	0	0	0	0	1	0		1	0		0	0		0		0	0	1	1	1	0	1		1	0	2	1	5		1		4
389	28	1	3	1	0	1	0	2	1	14	2	0	1	2	0	0	4	0	1	6	0	1	0		3	1		0	0		0		0	1	1	1	1	0	1		1	1	4	1	2		1		1
62	48	1	3	1	1	1	0	2	2	22	2	0	0	0	0	0	1	0	1	2	0	1	0		1	0		0	0		0		0	0	1	0	0	0	1		1	1	0	1	5		0	Friend	2
213	32	1	2	2	0	1	0	1	1	20	1	0	0	0	0	0	4	1	1	5	0	1	0		3	3		1	3		1		0	1	1	1	1	0	0		1	1	3	1	1		3		6
196	25	1	4	2	0	1	0	1	1	14	2	0	0	0	0	0	2	1	1	3	1	1	0		2	1		1	1		3		1	1	1	1	0	0	0		1	1	2	2	4		3		4
102	33	1	2	1	0	1	0	1	2	16	2	0	0	0	0	0	1	0	1	4	0	1	0		1	1		0	0		0		1	1	1	1	1	0	0		1	1	3	1	5		1		5
268	23	1	1	2	0	1	0	1	1	16	1	1	1	1	1	1	2	1	1	7	1	1	0		1	1		0	0		0		1	1	1	1	1	0	0		1	1	3	1	5		4		6
89	26	1	1	1	0	1	0	1	1	16	2	0	1	1	0	1	1	0	0	0	0	1	0		1	0		0	0		0		0	1	1	1	0	0	1		1	1	0	1	5		1		5
261	33	1	1	1	0	1	0	1	3	18	1	1	0	0	0	0	4	1	1	3	1	1	0		2	1		1	1		1		1	1	1	0	1	1	0		1	1	3	1	2		4		4
254	30	1	2	1	0	1	0	2	2	17	2	0	0	0	0	0	1	1	1	4	0	1	0		1	1		1	1		1		0	1	1	1	0	0	0		1	1	4	1	2		4		5
98	31	1	2	1	0	1	0	1	1	14	2	0	0	0	0	0	1	1	1	7	1	1	0		1	3		0	0		0		1	1	1	1	0	0	1		1	1	3	1	4		1		5
21	24	1	2	2	0	1	0	2	2	20	2	0	0	0	0	0	2	1	1	3	1	1	0		2	1		0	0		0		0	1	1	1	1	1	1		1	1	2	2	5		1		2
407	47	1	2	1	0	1	0	2	2	18	1	0	0	0	0	0	4	1	1	6	0	1	0		3	0		0	0		0		1	1	1	1	0	0	1		1	1	4	1	1		1		1
30	28	1	4	2	0	1	0	1	1	21	2	0	0	0	0	0	3	1	0	0	0	1	0		3	1		1	1		0	NOT NEEDED	1	0	1	0	1	0	1		1	1	1	1	5		1		6
352	40	1	2	2	1	1	0	1	2	14	3	1	1	1	1	1	1	1	1	3	1	1	0		1	0		1	1		1		1	1	1	1	1	0	0		1	1	2	2	2		4		1
182	28	1	1	1	0	1	0	1	1	15	3	0	1	1	1	1	2	1	1	5	0	1	0		3	3		0	0		0		0	1	1	1	1	0	1		1	1	0	1	5		2		5
272	33	1	2	2	0	1	0	1	1	18	2	1	1	1	1	2	1	1	0	0	0	1	0		1	1		1	1		1		1	1	1	1	1	0	0		1	1	3	1	5		1		3
381	33	3	1	1	0	1	0	1	1	12	3	1	0	0	0	0	2	0	1	7	1	1	0		1	1		0	0		0		1	1	1	1	0	0	1		1	1	2	1	5		1		6
105	27	1	2	1	0	1	0	2	1	17	2	0	0	0	0	0	1	0	1	2	0	1	0		3	1		1	3		3		1	1	1	0	0	1	0		1	1	4	1	5		1		2
195	38	1	2	2	0	1	0	1	2	17	1	0	0	0	0	0	4	1	1	2	0	1	0		3	3		0	0		0		0	1	1	1	1	1	0		1	1	3	1	5		1		5
265	32	1	2	2	1	1	0	2	1	16	2	0	0	0	0	0	1	1	1	7	1	1	0		1	1		0	0		0		1	1	1	1	1	0	0		1	1	2	1	1		3		5
25	25	1	1	2	0	1	0	1	1	19	1	0	0	0	0	0	4	0	1	7	1	1	0		1	1		0	0		0		1	1	1	1	1	0	1		1	1	1	1	1		1		4
91	32	1	2	2	0	1	0	1	1	17	3	0	0	0	0	0	1	0	1	5	0	1	0		1	1		0	0		0		1	1	1	1	0	1	1		1	1	3	1	1		1		5
3	33	1	2	1	0	1	0	1	1	21	2	0	0	0	0	0	1	0	1	4	0	1	0		1	1		1	3		0		1	1	1	1	0	0	1		1	1	4	1	1		1		2
259	37	1	1	1	0	1	0	2	3	17	2	0	0	0	0	0	1	1	0	0	0	1	0		1	1		1	1		1		1	1	1	0	0	0	1		1	1	3	1	5		1		4
94	21	1	1	1	0	1	0	1	1	16	2	0	0	0	0	0	2	0	1	5	0	1	0		1	0		0	0		0		1	1	1	1	1	0	1		1	1	2	1	1		1		5
348	40	1	1	1	0	1	0	1	1	18	2	0	0	0	0	0	1	0	0	0	0	1	0		1	1		0	0		0		1	1	1	1	1	1	1		1	1	1	1	1		1		4
314	26	1	2	1	0	1	0	1	1	16	2	0	1	1	1	1	1	0	0	0	0	1	0		1	1		0	0		0		1	1	1	1	1	1	1		1	1	2	1	4		1		3
260	46	2	2	2	0	1	0	1	1	17	2	0	0	0	0	0	2	0	1	7	0	1	0		1	0		0	0		0		0	1	0	0	1	0	0		1	1	2	2	1		5		6
311	35	3	2	1	0	1	0	1	1	16	2	0	0	0	0	0	1	0	0	0	0	1	0		1	1		0	0		0		1	1	1	1	1	0	1		1	1	1	1	4		1		4
71	28	1	4	1	0	1	0	1	1	18	1	0	0	0	0	0	4	1	1	2	0	1	0		2	0		0	0		0		1	1	1	1	1	0	1		1	1	2	1	1		1		3
95	26	1	2	1	0	1	0	1	1	16	2	0	0	0	0	0	1	0	0	0	0	1	0		1	1		0	0		0		1	1	1	1	1	0	1		1	1	2	1	1		1		5
269	29	1	2	1	0	2	1	1	1	16	2	1	0	0	0	0	1	1	0	0	0	1	0		2	1		0	0		0		1	0	1	1	0	0	0		1	1	0	1	4		1		6
135	32	1	1	2	0	2	1	2	1	19	2	0	0	0	0	0	1	0	0	0	0	1	0		1	3		0	0		0		0	0	0	1	0	0	0		1	1	3	1	1		3		3
134	30	2	3	1	0	2	1	1	1	16	1	0	0	0	0	0	4	1	1	5	0	1	0		2	0		0	0		0		1	1	1	0	1	0	1		1	1	3	1	1		1		5
51	28	1	1	1	0	2	1	1	1	16	3	0	0	0	0	0	2	1	1	4	0	1	0		2	1		0	0		0		1	1	1	1	1	0	1		1	1	0	2	5		5		4
67	27	1	3	2	0	2	1	2	1	18	1	0	0	0	0	0	4	0	1	3	0	1	0		1	3		1	1		1		1	1	1	1	1	1	1		1	1	3	1	5		1		5
226	22	1	3	1	0	2	1	1	1	20	2	0	0	0	0	0	3	0	1	2	0	0	5		0	3		0	0		0		0	1	1	1	1	0	0		1	1	4	1	5		1		5
177	32	1	2	1	0	2	1	2	2	19	2	0	0	0	0	0	1	0	1	6	0	1	0		1	1		0	0		0		1	1	1	1	1	0	1		1	1	2	1	5		1		3
247	23	1	2	1	0	2	1	1	1	18	3	0	0	0	0	0	1	0	1	2	1	1	0		1	1		1	3		1		0	1	1	1	0	0	1		1	1	3	1	5		1		6
396	41	1	2	2	0	2	1	2	1	16	2	0	0	0	0	0	1	1	1	3	0	1	0		1	3		0	0		0		0	1	1	1	0	0	0		1	1	0	1	5		1		6
296	23	1	2	1	0	2	1	2	1	19	1	0	0	0	0	0	4	0	1	7	0	1	0		1	0		0	0		0		0	0	1	0	0	0	1		1	1	2	2	5		1		6
256	41	1	2	1	0	2	1	1	1	18	2	0	0	0	0	0	1	0	1	3	0	0	5		0	0		0	0		0		1	1	1	1	1	0	1		1	1	2	1	1		1		5
401	24	1	2	1	0	2	1	1	1	18	2	1	0	0	0	0	3	1	1	5	1	1	0		1	0		1	3		1		0	1	0	0	0	0	0		1	1	0	2	5		1		6
152	31	1	2	1	0	2	1	2	3	14	3	1	1	2	1	1	1	0	0	0	0	1	0		3	1		1	1		5		1	1	0	1	0	0	1		1	0	2	1	5		1		3
24	26	1	4	1	0	2	1	1	1	18	2	0	0	0	0	0	1	0	0	0	0	1	0		0	1		1	2		1		0	0	1	0	1	0	1		1	1	2	2	1		4		3
232	22	1	2	1	0	2	1	2	1	20	2	0	0	0	0	0	1	0	1	3	0	1	0		1	0		0	0		0		1	1	1	1	1	0	0		1	1	4	1	5		1		5
406	38	1	1	1	0	2	1	1	1	18	2	0	0	0	0	0	1	0	1	5	0	1	0		3	0		0	0		0		1	0	1	1	1	0	1		1	1	3	1	1		4		1
178	25	1	3	1	0	2	1	2	1	18	2	0	0	0	0	0	1	0	1	2	0	1	0		3	0		0	0		0		0	0	1	1	1	0	1		1	1	2	1	2		1		3
257	23	1	3	1	0	2	1	1	1	17	2	0	0	0	0	0	1	0	1	5	1	1	0		2	2		0	0		0		0	1	1	1	1	0	1		1	1	3	1	4		5		6
156	28	1	2	1	0	2	1	2	2	18	1	0	0	0	0	0	4	1	1	6	0	1	0		1	0		0	0		0		0	0	0	0	1	1	0		1	0	0	1	5		1		6
360	22	1	2	2	0	1	1	2	1	18	2	0	0	0	0	0	1	1	1	1	1	1	0		1	0		0	0		0		1	1	1	1	1	1	1		1	1	3	2	1		2		2
380	33	1	2	1	0	2	1	2	1	18	2	0	0	0	0	0	2	0	1	7	0	1	0		1	1		0	0		0		1	1	1	1	0	0	1		1	1	2	1	1		1		3
273	27	1	2	1	0	2	1	1	2	17	2	0	0	0	0	0	2	0	0	0	0	1	0		1	3		0	0		0		0	1	1	1	1	0	0		1	1	3	1	5		1		3
218	25	1	2	1	0	2	1	2	1	17	1	1	0	0	0	0	3	0	1	4	0	1	0		2	1		0	0		0		0	1	0	1	1	0	1		1	1	2	1	5		1		6
197	30	2	2	1	0	2	1	1	1	18	2	0	0	0	0	0	2	1	1	7	0	1	0		2	0		0	0		0		0	1	1	1	0	0	1		1	1	3	1	5		1		3
384	25	1	3	1	0	2	1	1	2	18	2	0	0	0	0	0	2	0	1	5	0	1	0		2	1		0	0		0		1	1	1	0	1	0	1		1	1	3	1	1		4		6
284	40	1	1	1	0	2	1	2	2	18	2	0	0	0	0	0	1	1	1	4	0	1	0		1	1		0	0		0		1	1	1	1	1	1	1		1	1	1	2	1		1		4
75	30	1	1	1	0	2	1	1	2	18	2	0	0	0	0	0	1	0	1	2	0	1	1		1	1		1	1		1		0	1	1	1	0	0	0		1	1	4	1	1		1		2
234	43	2	1	1	0	2	1	2	1	16	2	0	0	0	0	0	2	0	1	6	0	1	0		2	0		0	0		0		0	1	1	1	0	0	1		1	1	3	1	5		1		5
70	28	1	2	1	0	2	1	2	1	18	2	0	0	0	0	0	1	0	0	0	0	1	0		1	0		0	0		0		1	1	1	0	1	1	0		1	1	3	1	2		1		2
73	22	1	4	1	0	1	1	1	1	18	2	0	0	0	0	0	1	1	0	0	0	1	0		3	1		1	1		4		1	1	1	1	1	1	1		1	1	3	2	1		3		4
22	23	1	4	2	0	2	1	2	1	21	2	0	0	0	0	0	4	1	0	0	0	1	0		1	0		0	0		0		1	1	1	1	1	0	1		1	1	2	1	5		1		6
9	21	1	2	1	0	2	1	1	1	14	3	0	0	0	0	0	4	0	0	0	0	1	0		2	1		1	1		1		1	1	0	1	1	1	1		1	1	1	1	1		1		6
27	21	1	2	1	1	2	1	1	1	17	2	0	0	0	0	0	4	1	1	2	0	1	0		3	2		1	2		3		1	1	1	1	1	1	1		1	1	2	2	1		4		3
319	35	2	3	1	0	2	1	1	2	18	2	0	0	0	0	0	1	0	1	3	1	1	0		1	0		0	0		0		0	1	1	0	1	0	1		1	1	1	1	1		0	Husband	3
110	32	1	2	2	0	2	1	1	1	18	2	0	0	0	0	0	1	1	1	2	0	1	0		1	2		1	0	PCV	1		0	1	1	1	0	0	1		1	1	4	1	5		2		4
216	34	2	2	1	0	2	1	1	1	16	2	0	0	0	0	0	2	0	1	4	0	1	0		3	0		0	0		0		0	0	1	1	0	0	1		1	1	0	1	1		1		4
144	40	2	2	1	0	2	1	2	1	16	2	0	0	0	0	0	1	0	0	0	0	0	2		0	0		0	0		0		0	1	1	1	0	0	1		1	1		2	4		0	Husband	2
402	38	2	1	1	0	2	1	2	1	22	0	0	0	0	0	0	4	1	1	3	0	1	0		3	1		0	0		0		1	1	1	1	1	1	1		1	1	3	1	1		1		1
227	23	1	2	1	0	2	1	1	1	15	1	0	0	0	0	0	4	1	1	3	0	1	1		0	0		0	0		0		1	1	1	1	1	0	0		1	1	3	1	1		1		5
379	56	1	1	2	0	2	1	2	1	17	2	0	0	0	0	0	4	0	1	6	1	1	0		1	3		1	1		1		1	1	1	0	1	0	0		1	1	3	1	5		6		6
58	26	1	3	1	0	2	1	1	2	21	2	0	0	0	0	0	2	1	1	1	0	1	0		1	2		1	1		1		1	1	1	1	1	0	1		1	1	1	1	5		1		2
142	25	1	2	1	0	2	1	1	1	19	2	0	0	0	0	0	4	0	1	1	0	1	0		1	2		1	2		1		0	1	1	1	0	0	1		1	1	0	2	1		1		5
108	33	1	2	1	0	2	1	2	1	16	2	0	0	0	0	0	2	1	1	5	0	1	0		3	1		0	0		0		1	1	1	1	0	1	0		1	1	4	2	1		3		5
362	22	2	3	2	0	2	1	2	1	17	2	0	0	0	0	0	1	0	1	7	1	1	0		1	1		1	1		5		1	1	1	1	1	1	1		1	1	2	1	5		2		6
285	22	1	1	1	0	2	1	1	3	15	2	0	0	0	0	0	1	0	1	5	0	1	0		2	1		0	0		0		1	1	1	1	1	1	1		1	0	3	1	1		2		4
36	28	1	2	1	0	2	1	2	1	15	2	0	0	0	0	0	1	0	1	3	0	1	0		0	1		0	0		0		1	0	1	1	0	0	0		1	1	4	1	5		1		3
358	22	1	2	1	0	2	1	1	1	18	2	0	0	0	0	0	4	1	0	0	0	1	0		1	3		1	1		1		0	0	1	1	0	0	0		1	1	0	1	1		1		4
190	21	1	1	1	0	2	1	1	1	17	1	0	0	0	0	0	4	0	1	1	0	1	0		2	2		1	1		4		0	0	0	0	1	0	0		1	1	0	2	2		1		1
298	23	1	1	1	0	2	1	1	1	15	1	0	0	0	0	0	2	1	1	6	0	1	0		1	1		0	0		0		1	1	1	1	0	0	1		1	1	4	1	1		3		1
376	27	1	2	1	1	2	1	2	2	19	2	0	0	0	0	0	1	1	1	5	0	1	0		3	2		0	0		0		1	1	1	1	1	1	1		1	1	2	1	1		1		4
87	27	1	4	1	0	2	1	2	1	18	2	0	0	0	0	0	1	0	0	0	0	1	0		1	1		0	0		0		1	1	1	1	1	1	1		1	1	2	2	1		3		4
308	24	1	3	1	0	2	1	1	1	18	1	0	0	0	0	0	3	1	1	3	1	0	0	NEGLIGENCE	0	1		0	0		0		0	1	1	1	1	0	1		1	1	2	1	5		1		5
291	32	3	1	1	1	2	1	2	1	16	2	0	0	0	0	0	1	0	1	5	1	1	0		2	0		0	0		0		0	1	1	1	1	1	1		1	1	2	1	1		1		5
44	25	1	1	1	0	2	1	2	1	19	2	0	0	0	0	0	4	0	1	2	0	1	0		1	3		1	1		1		0	1	1	1	0	0	1		1	1	3	1	3		1		1
132	30	1	3	2	0	2	1	2	1	24	2	1	0	0	0	0	2	0	1	5	0	1	0		2	0		0	0		0		0	1	1	0	0	0	1		1	1	2	2	5		1		5
59	33	1	2	2	1	2	1	2	2	12	2	0	0	0	0	0	1	0	1	2	1	1	0		1	1		0	0		0		0	1	1	1	1	0	1		1	1	2	1	5		2		2
78	24	1	2	1	0	1	1	2	1	16	2	0	0	0	0	0	2	1	0	0	0	1	0		2	1		1	1		5		1	1	1	1	1	1	1		1	1	2	2	1		1		3
81	36	1	2	2	0	2	1	2	2	18	3	0	0	0	0	0	1	0	1	2	0	1	0		2	0		0	0		0		1	1	1	1	1	1	1		1	1	2	2	1		1		4
120	40	3	2	1	0	2	1	2	2	18	2	0	1	2	1	2	1	0	0	0	0	1	0		2	1		0	0		0		0	1	1	1	0	0	1		1	1	3	1	5		1		3
278	28	1	1	2	0	2	1	2	2	18	3	0	1	1	1	2	1	1	1	2	0	1	0		1	0		1	3		1		1	1	1	1	1	1	1		1	1	2	2	5		1		3
394	24	1	3	2	1	2	1	1	1	19	1	0	0	0	0	0	2	0	0	0	0	1	0		2	4		0	0		0		1	1	1	1	1	1	1		1	1	2	1	1		1		6
299	37	1	1	1	0	2	1	2	2	19	2	0	1	2	1	2	1	0	1	3	0	1	0		3	1		1	1		1		1	1	1	1	0	0	1		1	1	4	1	1		3		1
252	22	1	2	1	0	2	1	1	1	18	2	0	0	0	0	0	4	1	1	4	1	1	0		3	1		0	0		0		1	1	1	1	1	0	1		1	1	4	1	1		5		2
17	27	1	2	1	0	2	1	1	1	15	2	0	0	0	0	0	2	0	0	0	0	1	0		1	0		0	0		0		1	1	1	1	1	0	0		1	1	2	1	5		5		4
366	35	1	2	2	1	2	1	2	1	19	2	0	0	0	0	0	1	0	1	5	0	1	0		1	1		1	1		1		0	1	1	0	0	1	0		1	1	3	1	1		3		5
383	26	1	2	1	0	2	1	1	1	18	2	0	0	0	0	0	1	0	0	0	0	1	0		1	1		0	0		0		1	1	1	1	0	0	1		1	1	1	1	1		4		4
223	27	1	1	1	0	2	1	1	1	17	2	0	0	0	0	0	1	1	1	4	0	1	0		1	0		0	0		0		0	1	1	1	1	0	0		1	1	0	2	4		1		5
323	29	1	2	1	0	2	1	2	2	16	2	1	1	1	1	2	1	0	1	7	0	1	0		2	2		1	1		5		1	1	1	0	1	0	1		1	1	3	1	5		1		4
200	28	1	1	1	0	2	1	1	1	18	0	0	0	0	0	0	4	0	1	4	0	1	0		3	0		0	0		0		1	0	1	0	1	0	1		1	1	0	1	1		1		1
363	29	2	3	2	0	2	1	1	1	14	2	1	0	0	0	0	1	1	0	0	0	1	0		1	1		0	0		0		1	0	1	1	1	0	0		1	1	1	1	1		1		5
371	22	1	4	1	0	2	1	2	1	18	3	0	0	0	0	0	4	0	1	3	0	1	0		1	1		0	0		0		1	1	1	1	1	0	1		1	1	3	1	1		2		2
388	23	1	2	1	0	2	1	1	1	18	2	0	0	0	0	0	1	0	1	4	1	1	0		3	4		0	0		0		1	0	1	1	0	0	1		1	1	2	1	2		1		2
118	32	1	1	1	0	2	1	2	1	18	2	1	0	0	0	0	2	1	1	7	1	1	0		2	0	NONE	0	0		0		1	1	1	0	0	0	0		1	1	0	2	5		1		6
31	21	1	4	1	0	2	1	1	1	16	1	0	0	0	0	0	4	1	1	2	0	0	4		0	1		0	0		0		0	1	0	1	1	0	0		1	1	1	1	2		1		5
86	23	1	1	1	0	2	1	1	1	18	2	0	0	0	0	0	1	1	1	2	0	1	0		3	1		0	0		0		0	1	1	0	1	0	1		1	1	1	2	5		1		6
399	28	1	2	1	1	2	1	2	1	20	2	1	1	1	0	0	1	0	1	7	1	1	0		1	0		1	1		1		1	0	1	0	1	0	0		1	1	3	1	1		1		6
85	22	1	2	1	0	1	1	1	2	15	2	0	0	0	0	0	4	1	1	4	0	0	0		2	1		0	0		0		1	1	1	1	1	1	1		1	1	2	2	5		1		6
402	22	1	2	1	0	2	1	1	1	20	2	0	1	1	1	1	2	1	1	2	0	1	1		1	0		0	0		0		1	0	1	1	0	0	1		1	0	2	1	1		1		4
312	29	2	2	2	0	2	1	1	1	18	2	0	0	0	0	0	1	0	0	0	0	1	0		1	1		0	0		0		0	1	1	1	0	0	1		1	0	1	1	1		1		4
410	23	1	4	1	0	2	1	1	1	18	2	0	0	0	0	0	2	0	1	1	1	1	0		3	0		0	0		0		0	0	1	1	1	0	1		1	1	1	2	4		4		1
100	43	2	2	2	0	2	1	2	2	18	2	0	0	0	0	0	1	0	1	4	0	1	0		1	2		1	1		1		0	1	1	0	0	0	0		1	1	2	2	1		1		5
2	31	3	2	1	0	2	1	1	1	19	1	0	0	0	0	0	4	0	1	4	0	1	0		3	2		0	0		0		0	1	1	1	0	0	1		1	1	3	1	1		2		5
240	26	1	1	1	0	2	1	2	1	15	2	0	0	0	0	0	1	0	0	0	0	1	0		2	0		0	0		0		1	1	1	1	0	0	1		1	1	4	1	5		1		1
266	29	1	2	1	0	2	1	2	1	19	2	0	0	0	0	0	3	1	0	0	0	1	0		1	1		0			0		1	0	1	1	1	0	0		1	1	2	2	1		1		3
212	42	1	2	1	0	2	1	2	1	25	2	0	0	0	0	0	4	0	1	3	0	1	0		1	0		0	0		0		1	1	1	1	1	0	0		1	1	4	1	5		1		5
201	24	1	1	1	0	2	1	1	1	17	2	0	0	0	0	0	1	0	0	0	0	0	5		0	0		0	0		0		0	0	1	1	0	1	0		1	1	0	1	5		1		2
233	40	1	1	1	1	2	1	2	1	18	2	0	0	0	0	0	4	0	0	0	0	1	0		1	4		1	2		1		0	0	1	1	0	0	1		1	1	2	1	5		5		2
147	37	1	2	2	0	2	1	1	2	24	2	0	0	0	0	0	2	0	1	1	0	1	0		3	3		0	0		0		1	1	1	0	1	0	1		1	1	0	1	5		1		6
390	32	1	3	1	0	2	1	2	2	18	1	0	0	0	0	0	4	0	1	3	0	1	0		3	1		0	0		0		1	1	1	1	1	0	1		1	1	1	1	1		3		1
214	28	1	2	1	0	2	1	1	1	15	1	1	0	0	0	0	4	1	0	0	0	1	0		1	2		0	0		0		0	1	1	0	0	0	1		1	1		2	5		1		6
303	25	1	2	1	0	2	1	2	1	17	2	1	0	0	0	0	1	0	1	7	1	1	0		1	1		0	0		0		1	1	1	1	1	1	1		1	1	4	1	1		1		1
365	30	1	4	1	0	2	1	1	1	14	2	0	0	0	0	0	3	0	0	0	0	1	0		1	1		0	0		0		1	1	1	1	1	1	1		1	1	4	1	4		1		2
369	25	1	2	1	0	2	1	1	2	16	1	0	1	1	1	2	4	0	1	1	0	1	0		2	1		0	0		0		1	0	1	0	0	0	0		1	1	1	1	1		1		4
282	29	1	2	2	0	2	1	2	2	13	1	0	0	0	0	0	4	1	0	0	0	1	0		1	1		0	0		0		1	0	1	0	1	1	1		1	1	2	2	1		1		6
367	24	2	3	2	1	2	1	1	1	17	2	0	0	0	0	0	1	0	1	2	1	1	0		1	0		1	3		1		1	1	1	1	1	1	1		1	1	2	1	5		1		6
72	23	1	4	1	0	2	1	1	1	15	1	0	0	0	0	0	4	0	1	4	0	1	0		2	1		0	0		0		1	1	1	1	0	0	0		1	1	3	2	4		1		4
176	21	1	1	1	1	2	1	1	3	18	4	1	1	2	1	1	1	1	1	6	0	1	0		1	1		0	0		0		1	1	1	1	1	1	1		1	1	4	1	5		1		2
374	23	1	2	1	1	1	1	1	1	18	2	0	1	1	1	1	2	1	0	0	0	1	0		2	1		0	0		0		1	1	1	1	1	1	1		1	1	3	1	1		5		3
243	37	1	2	2	0	2	1	2	1	17	2	0	0	0	0	0	3	0	1	2	0	1	0		2	0		0	0		0		1	1	1	0	0	0	1		1	0	0	1	2		1		2
246	24	1	2	1	0	2	1	1	1	16	2	0	0	0	0	0	3	0	1	2	0	1	0		2	0		0	0		0		1	1	1	1	1	0	1		1	1	3	1	5		5		3
368	27	1	4	2	0	2	1	1	1	18	2	0	0	0	0	0	1	0	1	4	0	1	0		2	1		0	0		0		0	1	1	1	1	0	0		1	1	0	1	1		3		4
255	28	1	2	1	0	2	1	1	1	18	2	0	0	0	0	0	1	0	1	4	0	1	0		1	0		0	0		0		0	1	1	1	1	0	0		1	1	3	1	1		1		4
258	27	1	1	1	0	2	1	1	1	19	2	0	0	0	0	0	3	1	1	3	1	1	0		1	1		0	0		0		1	1	1	1	0	1	0		1	1	0	1	1		1		4
307	27	1	2	1	0	2	1	1	2	14	2	0	0	0	0	0	1	0	1	5	0	1	0		1	1		1	1		1		1	1	1	1	1	0	1		1	1	2	1	5		1		5
228	61	2	1	1	1	2	1	2	1	16	2	0	0	0	0	0	4	0	1	2	0	1	0		1	3		0	0		0		0	1	1	1	1	0	1		1	1	3	1	3		5		1
53	28	1	1	2	1	2	1	1	1	14	2	0	0	0	0	0	1	0	1	4	1	1	0		2	1		1	1		5		1	1	1	1	1	0	1		1	1	1	2	4		1		5
209	25	1	4	2	1	2	1	2	1	20	2	1	0	0	0	0	1	0	0	0	0	1	0		1	0		0	0		0		1	1	1	0	0	1	0		1	1	4	2	3		1		6
65	27	1	2	2	0	2	1	2	1	20	2	0	1	1	1	2	4	0	1	5	0	1	0		1	1		1	1		1		1	1	1	1	1	0	1		1	1	4	1	5		1		5
350	36	1	2	2	0	2	1	1	1	17	2	0	0	0	0	0	1	0	1	3	0	1	0		2	0		0	0		0		1	1	1	1	1	0	0		1	1	3	1	1		3		4
60	29	2	3	2	0	2	1	2	1	20	2	0	0	0	0	0	1	0	1	2	0	0	0		1	3		0	0		0		0	1	1	1	1	1	1		1	1		1	3		1		5
353	26	1	1	2	0	2	1	2	1	21	2	0	0	0	0	0	4	0	0	0	0	1	0		3	0		0	0		0		1	1	1	1	1	0	0		1	1	3	1	5		1		5
167	32	1	3	2	0	2	1	2	1	18	2	0	0	0	0	0	2	0	1	3	1	1	0		1	1		0	0		0		1	1	1	1	1	1	1		1	1	2	1	1		1		1
47	26	1	2	2	1	2	1	1	2	17	2	0	0	0	0	0	1	0	1	7	1	1	0		1	0		0	0		0		0	1	1	1	0	0	1		1	1	2	1	1		5		5
385	23	1	1	1	0	2	1	1	2	16	1	0	0	0	0	0	4	1	1	4	1	1	0		1	1		0	0		0		1	1	1	0	1	0	0		1	1	1	1	1		1		6
103	30	1	2	2	0	2	1	2	1	19	2	0	0	0	0	0	1	0	1	3	0	1	0		1	1		1	1		1		0	1	1	1	1	0	0		1	1	4	1	2		5		5
320	33	2	2	1	0	2	1	2	2	19	2	0	0	0	0	1	1	0	1	4	0	1	0		1	2		0	0		0		0	1	1	0	1	1	1		1	1	2	2	1		5		3
274	24	1	2	1	0	2	1	1	1	18	2	0	0	0	0	0	2	0	1	2	0	0	4		0	1		0	0		0		1	1	1	1	1	0	1		1	1	2	1	2		1		4
127	38	1	2	1	1	2	1	1	1	12	2	0	0	0	0	0	3	0	1	2	0	1	0		2	0		0	0		0		1	1	1	0	0	0	0		1	1	3	1	5		3		5
169	28	1	2	1	0	2	1	1	2	20	2	0	0	0	0	0	2	0	0	0	0	0	0		2	1		0	0		0		1	0	0	0	0	0	1		1	0	0	2	3		4		2
242	28	1	2	2	0	2	1	1	1	19	2	1	1	2	1	2	1	0	1	4	0	1	0		1	1		0	0		0		1	1	1	1	0	0	1		1	1	3	1	5		1		1
184	23	1	3	2	0	2	1	2	1	19	2	0	0	0	0	0	2	0	1	4	0	1	0		1	1		0	0		0		0	0	0	0	1	0	0		1	1	3	1	2		1		5
375	32	2	2	1	0	1	1	2	2	14	4	1	1	2	1	1	4	1	1	7	1	1	0		1	1		0	0		0		1	1	1	1	0	0	0		1	1	2	1	5		1		6
48	23	1	2	2	0	2	1	2	1	16	2	0	0	0	0	0	1	1	1	4	1	1	0		2	0		0	0		0		1	1	1	1	1	0	1		1	1	3	1	4		1		3
74	36	1	2	1	0	2	1	2	2	14	3	0	0	0	0	0	1	1	1	3	0	1	0		3	2		1	1		2		1	1	1	1	1	0	0		1	1	4	1	1		1		5
83	30	2	1	1	0	2	1	2	2	14	2	1	0	0	0	0	2	0	1	3	0	1	0		1	1		1	1		1		1	1	1	1	1	1	1		1	1	2	2	1		5		4
6	28	1	2	1	0	2	1	1	1	18	3	0	0	0	0	0	2	1	1	2	0	1	0		2	0		0	0		0		1	1	1	1	1	1	1		1	1	2	1	4		1		2
99	43	2	2	2	0	2	1	2	1	20	2	0	0	0	0	0	1	0	1	4	0	1	0		1	3		0	0		0		1	1	1	1	1	0	1		1	1	3	1	5		1		5
38	37	1	2	1	0	2	2	1	3	15	3	0	1	1	1	1	1	1	1	2	0	1	0		1	3		1	3		1		1	0	1	1	1	0	1		1	1	3	1	2		1		2
263	24	1	3	1	0	2	2	1	2	18	2	0	1	1	0	0	1	1	1	5	0	1	0		1	1		0	0		0		1	1	1	0	1	0	0		1	0	2	1	5		1		6
386	27	1	3	1	0	2	2	2	1	20	2	0	0	0	0	0	2	1	1	3	0	1	0		2	1		0	0		0		1	1	1	1	1	0	1		1	1	1	1	1		1		5
344	27	1	3	1	0	2	2	1	1	18	2	1	0	0	0	0	1	0	1	3	0	1	0		1	1		0	0		0		1	0	1	0	0	1	1		1	1	3	2	5		1		5
377	32	2	1	1	0	2	2	1	2	13	3	1	1	2	1	2	1	0	1	7	1	1	0		1	4		1	2		3		1	1	1	1	1	1	0		1	1	4	1	5		1		6
183	29	1	2	1	1	2	2	1	1	16	2	1	1	1	1	2	1	0	1	2	0	1	0		2	0		0	0		0		1	1	1	1	1	0	1		1	1		1	5		1		5
318	33	2	1	2	1	2	2	1	1	18	3	0	0	0	0	0	1	0	0	0	0	1	0		1	1		0	0		0		1	1	0	1	0	0	0		1	1	0	2	1		1		4
294	40	3	1	1	0	2	2	2	1	18	2	0	0	0	0	0	4	0	1	1	0	1	0		1	0		0	0		0		0	1	1	0	1	1	1		1	1	3	1	1		1		6
222	40	2	2	1	0	2	2	1	1	17	2	0	0	0	0	0	1	0	1	6	0	1			2	3		0	0		0		0	1	1	0	1	0	1		1	1	3	2	5		1		5
199	50	2	2	2	1	2	2	2	2	17	2	0	0	0	0	0	1	0	1	2	0	1	0		1	0		0	0		0		0	0	1	1	1	0	1		1	1	4	1	1		1		1
18	33	2	3	1	0	2	2	2	1	13	2	0	0	0	0	0	2	0	1	3	1	1	0		1	3		0	0		0		1	1	1	1	0	1	1		1	1	2	1	5		5		2
43	37	1	2	1	0	2	2	1	2	16	1	0	0	0	1	2	4	1	1	2	0	1	0		3	1		0	0		0		1	1	1	1	1	1	1		1	1	2	1	3		1		1
29	28	1	2	1	0	2	2	2	1	16	2	0	0	0	0	0	3	0	1	2	0	1	0		1	1		0	0		0		1	0	1	1	0	0	1		1	1	3	1	1		1		3
49	27	2	2	2	0	2	2	2	1	18	2	0	0	0	0	0	1	0	0	0	0	1	0		2	1		0	0		0		1	1	1	1	1	0	1		1	1	0	2	5		1		5
174	38	3	2	1	0	2	0	2	1	14	2	0	0	0	0	0	3	0	1	2	0	1	0		2	1		0	0		0		1	1	1	1	1	1	1		1	1	2	1	1		0	Customer	5
286	26	1	2	1	0	2	0	1	2	18	2	0	0	0	0	0	4	0	1	3	0	1	0		1	0		0	0		0		1	1	1	1	1	1	0		1	0	2	1	1		1		3
40	28	1	2	1	0	2	2	2	3	14	2	0	0	0	0	0	1	0	1	7	0	1	0		1	0		0	0		0		0	1	1	1	1	0	1		1	1	4	1	5		1		1
123	49	3	2	2	0	2	2	2	1	18	1	0	0	0	0	0	2	0	1	7	0	1	0		2	0		0	0		0		0	0	1	1	0	1	0		1	1	2	1	5		1		6
339	28	1	2	1	0	2	2	1	1	16	2	0	0	0	0	0	2	0	0	0	0	1	0		1	1		0	0		0		1	0	1	0	1	0	1		1	1	3	2	5		1		6
148	45	1	1	2	0	2	0	2	1	19	2	1	1	1	1	2	2	1	1	2	0	1	0		3	4		0	0		0		0	0	0	0	0	0	0		0	0	0	2	2		5		2
106	34	1	2	1	0	2	2	2	1	15	2	1	1	1	1	2	1	0	0	0	0	1	0		3	0		0	0		0		1	1	1	0	0	1	0		1	1	3	1	1		1		5
357	29	1	1	1	1	2	0	2	1	17	3	0	0	0	0	0	2	0	1	7	0	1	0		3	1		0	0		0		1	1	1	1	1	1	1		1	1	0	2	1		1		4
321	27	1	3	1	0	2	2	2	2	17	2	0	0	0	0	0	1	0	1	4	0	1	0		1	1		0	0		0		1	1	1	0	1	0	1		1	0	2	1	1		2		2
207	24	1	2	1	0	2	2	2	1	19	2	0	0	0	0	0	4	1	1	2	0	1	0		3	0		0	0		0		1	1	0	0	0	0	1		1	1	3	1	5		1		6
64	33	1	2	1	1	2	2	2	3	18	1	0	0	0	0	0	4	0	1	2	1	1	0		3	1		1	2		1		0	0	1	1	1	0	1		1	1	2	1	5		1		2
279	31	1	2	2	0	2	2	1	1	19	2	0	0	0	0	0	1	0	1	3	0	1	0		1	1		0	0		0		1	0	1	1	1	1	1		1	1	0	2	5		1		4
295	35	1	1	1	0	2	2	1	1	18	2	1	1	2	1	2	1	0	1	2	1	1	0		1	1		1	1		1		1	1	1	1	1	1	1		1	1	3	1	1		4		3
8	27	1	1	1	0	2	2	2	1	17	2	0	0	0	0	0	2	1	1	0	0	1	0		1	3		0	0		0		1	1	1	0	0	0	0		1	1	1	2	5		1		6
400	28	1	2	1	0	2	2	1	1	19	2	1	0	0	0	0	1	0	1	7	1	1	0		2	0		0	0		0		1	0	0	0	0	0	0		1	1	3	1	1		1		3
328	28	1	2	2	0	2	0	2	1	19	2	0	0	0	0	0	1	0	1	3	0	1	0		3	0		0	0		0		1	0	1	0	0	0	1		1	1	4	2	5		1		6
163	29	1	3	2	0	2	0	2	1	14	1	0	1	1	1	2	4	0	1	2	0	1	0		1	1		0	0		0		1	1	1	1	1	1	1		1	1	3	1	1		2		5
137	40	1	4	1	0	2	2	1	1	25	1	0	0	0	0	0	4	1	0	0	0	1	0		1	0		0	0		0		0	0	1	1	0	0	0		1	1	2	1	5		1		6
189	21	1	3	1	0	2	0	1	1	20	1	0	0	0	0	0	4	0	0	0	0	1	2		0	1		0	0		0		0	0	1	1	1	0	1		1	1	0	2	5		1		4
327	22	1	3	1	0	2	0	1	1	18	2	0	0	0	0	0	3	0	0	0	0	1	0		2	0		0	0		0		0	1	1	0	0	0	1		1	1	2	1	3		5		4
12	23	1	3	2	0	2	0	2	1	17	2	0	0	0	0	0	4	0	0	0	0	1	0		1	1		0	0		0		0	1	1	1	0	0	1		1	1	2	1	5		1		6
345	36	1	2	1	0	2	0	2	1	17	2	1	1	1	0	0	1	0	1	7	0	1	0		1	0		0	0		0		1	1	1	0	0	0	1		1	1	3	2	1		1		6
248	24	1	2	1	1	2	2	2	1	16	3	1	1	1	1	1	1	0	1	6	0	1	0		2	1		0	0		0		1	1	1	1	1	1	0		1	1	2	1	5		1		5
145	21	1	2	1	0	2	2	1	1	19	2	0	0	0	0	0	1	1	0	0	0	0	5		1	0		0	0		0		0	0	0	0	0	0	0		0	1	0	2	5		1		6
297	32	1	2	1	0	2	2	2	2	17	2	0	0	0	0	0	3	0	1	7	0	1	0		1	1		1	1		1		0	1	1	1	1	0	1		1	1	0	2	5		3		2
138	23	1	2	1	0	2	2	2	1	15	2	0	0	0	0	0	2	1	1	2	0	1	0		2	1		0	0		0		1	1	1	1	0	0	1		1	1	0	2	1		5		6
37	51	1	2	1	0	2	2	2	1	16	1	0	0	0	0	0	3	1	1	2	0	1	0		1	0		0	0		0		0	0	0	1	1	0	0		1	1	2	2	3		1		3
245	33	2	2	2	0	2	2	2	2	0	0	0	0	0	0	0	2	0	1	2	0	1	0		1	0		1	1		1		1	1	1	1	0	0	0		1	1	0	1	5		1		5
398	39	1	2	1	0	2	2	1	1	16	2	1	1	2	1	2	1	1	1	7	1	1	0		1	0		1	3		1		1	0	1	0	0	1	1		1	1	4	1	1		1		4
330	25	1	2	1	1	2	2	1	1	21	2	0	0	0	0	0	2	1	0	0	0	1	0		2	1		1	1		1		0	1	0	0	0	0	1		1	1	3	2	5		1		5
250	32	2	3	2	1	2	2	2	1	19	2	1	0	0	0	0	1	0	0	0	0	1	0		1	0		0	0		0		1	0	1	0	0	0	1		1	1	3	1	5		1		6
241	31	2	1	1	0	2	2	2	1	15	2	0	0	0	0	0	2	0	0	0	0	1	0		2	0		0	0		0		1	1	1	1	0	0	1		1	1	4	1	1		5		3
408	30	2	2	1	0	2	2	2	1	21	2	0	0	0	0	0	1	0	1	5	0	1	0		3	0		0	0		0		0	0	1	1	0	0	1		1	1	2	2	5		1		3
300	45	1	2	2	0	2	2	2	2	18	2	0	0	0	0	0	3	0	1	6	0	1	0		2	1		0	0		0		1	1	1	1	0	0	1		1	1	2	1	1		3		3
136	24	1	1	1	0	2	2	1	1	17	2	0	0	0	0	0	4	0	1	4	0	1	0		1	1		0	0		0		1	1	1	0	1	0	1		1	1	2	2	1		1		6
52	27	1	4	2	0	2	2	1	1	17	2	0	0	0	0	0	2	0	1	6	1	1	0		2	1		0	0		0		1	1	1	1	1	0	1		1	1	2	1	5		1		4
276	25	1	2	2	0	2	2	2	1	15	2	0	1	1	1	2	1	1	1	7	1	1	0		1	1		0	0		0		1	1	1	1	1	1	0		1	1	2	1	1		4		6
154	27	1	1	1	1	2	2	1	1	19	2	0	0	0	0	0	1	0	0	0	0	1	0		1	1		0	0		0		0	0	1	1	0	0	1		1	1		2	4		1		1
122	32	1	2	1	0	2	2	2	1	18	2	0	0	0	0	0	1	0	1	6	1	1	0		1	1		0	0		0		1	1	1	1	1	0	1		1	1	3	1	1		1		3
334	37	2	2	2	1	2	2	1	1	19	2	0	0	0	0	0	1	0	0	0	0	1	0		2	0		0	0		0		1	0	1	0	0	0	1		1	1	3	2	2		1		5
290	23	1	1	1	0	2	2	2	1	19	0	0	0	0	0	0	1	1	1	7	0	1	0		3	1		0	0		0		1	1	1	1	1	1	1		1	1	0	2	5		1		6
157	29	1	2	1	0	2	2	1	1	14	1	0	0	0	0	0	3	0	1	4	0	1	0		1	1		0	0		0		0	1	1	1	0	0	0		1	1	2	2	3		2		5
55	27	1	2	1	0	2	2	1	1	18	1	0	0	0	0	0	4	0	1	7	1	1	0		3	1		0	0		0		0	1	1	1	1	0	1		1	1	0	2	5		1		4
264	36	2	3	2	1	2	2	2	1	18	1	0	0	0	0	0	1	1	0	0	0	1	0		1	1		1	1		1		1	0	1	1	0	0	1		1	1	3	1	1		1		6
161	29	1	3	1	0	2	2	1	1	17	2	0	0	0	1	2	4	0	1	2	0	1	0		3	3		0	0		0		0	0	0	0	1	0	1		1	0	0	1	5		1		6
277	42	2	1	2	0	2	2	2	1	17	2	0	0	0	0	0	4	0	1	7	0	1	0		1	1		0	0		0		1	1	1	1	1	1	1		1	1	2	1	5		1		5
194	30	1	2	1	0	2	2	1	1	18	2	0	0	0	0	0	1	0	1	3	0	1	0		1	1		1	0	PCV	1		1	1	1	1	1	1	1		1	1	2	1	1		1		4
126	22	1	3	1	1	2	2	1	1	19	2	1	1	2	1	2	2	1	1	5	0	1	0		1	1		0	0		0		1	1	1	1	1	1	1		1	1	3	1	1		2		3
305	33	1	2	1	0	2	2	1	1	17	3	1	0	0	0	0	3	0	1	3	0	1	0		3	0		1	2		1		0	1	1	0	1	0	1		1	0	0	1	5		1		4
382	35	2	1	1	0	2	2	2	1	16	2	0	0	0	0	0	2	0	0	0	0	1	0		1	1		0	0		0		0	0	0	1	1	0	0		1	0	0	2	1		1		5
301	33	2	2	1	0	2	2	2	1	17	1	0	0	0	0	0	3	0	1	7	0	1	0		1	0		0	0		0		0	0	1	0	0	0	1		1	1	0	1	1		1		3
332	30	1	2	1	0	2	2	2	1	16	0	0	0	0	0	0	1	0	0	7	0	1	0		1	1		0	0		0		1	0	1	0	0	0	1		1	0	0	2	5		1		6
45	29	1	1	2	0	2	2	2	2	16	2	0	0		1	1	1	0	1	3	0	1	0		1	0		0	0		0		0	1	1	1	0	0	1		1	1	4	1	5		1		2
158	45	2	1	1	0	2	2	2	1	18	2	0	0	0	0	0	1	0	1	4	0	1	0		3	1		0	0		0		1	1	1	1	1	1	1		1	1	3	1	3		4		3
204	29	2	1	2	0	2	2	1	2	17	2	0	0	0	0	0	1	0	1	4	1	1	0		3	0		0	0		0		0	1	1	1	1	0	1		1	1	0	1	5		1		3
354	33	1	1	1	0	2	2	2	1	22	2	0	0	0	0	0	4	1	1	7	0	1	0		1	1		0	0		0		1	1	1	1	1	0	0		1	1	2	2	1		2		4
33	39	3	2	1	0	2	2	2	2	17	1	0	1	2	1	2	2	1	1	6	0	1	0		1	1		1	1		1		1	1	1	0	1	0	0		1	1	2	1	5		1		1
115	48	1	3	2	0	2	2	2	1	19	2	0	0	0	0	0	1	1	0	0	0	1	0		1	0		0	0		0		0	1	1	0	1	0	1		1	1	0	1	1		1		6
231	22	1	3	2	0	2	2	1	1	13	2	0	0	0	0	0	3	1	1	2	0	1	0		1	1		0	0		0		0	0	1	0	1	0	1		1	1	0	1	3		1		3
355	26	2	2	1	0	2	2	1	1	16	2	0	0	0	0	0	1	0	1	2	0	1	0		3	0		0	0		0		1	1	1	1	0	0	0		1	1	4	1	5		1		4
172	25	2	2	2	0	2	2	2	1	18	2	0	0	0	0	0	3	0	1	3	0	1	0		3	3		0	0		0		0	1	1	1	0	0	0		1	1	2	1	5		1		5
111	50	3	2	2	1	2	2	2	3	13	2	0	1	2	1	1	1	1	0	0	0	1	0		2	1		1	0	PCV	2		0	1	1	1	1	1	1		1	1	2	2	5		1		4
404	38	1	3	2	0	2	2	1	1	19	2	0	0	0	0	0	4	1	1	1	0	1	0		3	3		0	0		0		0	1	1	1	0	0	1		1	1	2	1	5		1		3
114	22	1	1	1	0	2	2	2	1	17	2	0	0	0	0	0	4	1	1	2	1	1	0		1	0		0	0		0		0	1	1	1	1	0	1		1	1	2	1	1		0	Friend	5
7	38	1	4	2	1	2	2	2	2	19	2	0	0	0	0	0	1	0	1	3	0	1	0		2	1		0	0		0		1	1	1	1	1	1	1		1	1	1	2	5		1		2
14	32	2	3	1	1	2	2	1	1	20	2	0	0	0	0	0	1	0	1	2	0	1	0		2	2		1	2		1		0	1	1	1	0	0	0		1	1	0	2	5		1		4
230	29	1	1	1	0	2	2	2	1	16	1	0	0	0	0	0	4	0	1	2	0	1	1		0	0		0	0		0		0	1	1	1	0	0	0		1	1	0	1	1		3		5
16	35	1	1	2	0	2	2	1	1	18	2	0	0	0	0	0	2	0	1	4	0	1	0		2	1		0	0		0		0	0	0	0	0	0	0		0	0	0	1	5		1		6
166	24	1	3	1	0	2	2	1	3	18	4	1	1	1	1	1	1	0	0	0	0	1	0		3	1		0	0		0		1	1	0	1	0	0	1		1	1		2	4		1		6
372	32	1	2	1	0	2	2	1	1	18	2	0	0	0	0	0	3	0	0	0	0	1	0		1	0		0	0		0		0	1	1	0	1	0	0		1	1	3	1	4		3		6
170	27	1	3	2	0	2	2	1	2	20	1	0	0	0	0	0	4	1	1	7	1	1	0		1	2		1	1		1		1	1	1	1	1	0	1		1	1	4	1	5		3		1
82	40	3	1	2	0	2	2	2	2	17	2	0	0	0	0	0	1	0	1	3	0	1	0		2	0		0	0		0		1	1	1	1	1	1	1		1	1	2	1	1		1		6
336	29	3	2	2	0	2	2	2	1	18	3	0	0	0	0	0	1	1	1	7	1	1	0		2	0		1	1		2		1	0	1	0	0	1	1		1	1	4	2	5		1		6
133	22	1	3	1	0	2	2	1	1	18	2	0	0	0	0	0	3	0	0	0	0	1	0		3	0		0	0		0		1	1	0	1	0	0	0		1	1	3	1	1		1		5
337	24	1	3	1	0	2	2	1	1	19	2	0	0	0	0	0	3	1	0	0	0	1	0		2	0		0	0		0		0	1	1	0	0	0	1		1	1	2	2	1		5		5
112	33	1	1	1	0	2	2	2	1	17	2	0	0	0	1	1	1	0	0	0	0	1	0		2	1		0	0		0		1	1	1	1	1	0	1		1	1	4	2	2		2		5
405	35	1	1	1	1	1	2	2	1	21	2	0	0	0	0	0	4	1	1	3	0	1	0		3	1		0	0		0		0	1	1	1	0	0	1		1	1	4	1	1		0	ANOTHER CUSTOMER	2
224	26	1	2	2	0	2	2	2	1	20	2	0	0	0	0	0	2	0	1	4	0	1	0		1	0		0	0		0		0	0	1	0	0	0	0		1	0	0	2	5		1		6
335	35	1	1	2	0	2	2	2	1	20	2	0	0	0	0	0	2	0	0	0	0	1	0		2	0		0	0		0		1	1	1	0	0	0	1		1	0	0	2	5		1		6
146	22	1	3	1	0	2	2	1	1	18	2	0	0	0	0	0	1	0	1	3	0	0	2		0	1		0	0		0		0	0	0	0	0	0	0		0	0	0	1	5		1		6
68	34	2	2	1	0	2	2	2	1	17	2	1	0	0	0	0	4	0	1	2	0	1	0		2	1		0	0		0		1	1	1	1	1	0	1		1	1	4	1	1		1		1
340	36	1	2	1	0	2	2	1	1	18	2	1	0	0	0	0	1	0	1	5	0	1	0		1	0		0	0		0		1	0	1	0	0	0	1		1	0	0	2	5		1		3
202	25	1	1	1	0	2	2	1	3	16	2	0	1	1	1	2	1	0	1	4	0	1	0		1	2		0	0		0		0	1	1	0	1	1	0		1	1	2	1	5		1		5
139	33	1	2	1	0	2	2	1	3	15	2	0	0	0	0	0	1	0	1	6	1	1	0		3	3		0	0		0		0	1	1	0	0	0	1		1	1	1	2	5		6		6
121	50	2	3	1	0	2	2	2	1	17	1	0	0	0	0	0	4	1	1	4	0	1	0		2	2		0	0		0		1	0	1	0	1	0	0		1	1	3	1	1		1		5
39	32	2	2	2	0	2	2	1	1	17	2	0	0	0	0	0	4	0	0	0	0	1	0		1	1		1	1		1		1	1	1	1	0	0	1		1	1	1	1	2		1		1
289	30	1	4	2	0	2	2	2	1	25	2	0	0	0	0	0	2	1	0	0	0	1	0		3	1		0	0		0		1	1	1	1	1	1	1		1	1	0	2	2		2		5
326	21	1	3	1	0	2	2	1	1	17	2	0	0	0	0	0	1	1	1	3	0	0	5		1	0		0	0		0		1	1	1	0	1	0	0		1	1	1	1	2		2		5
281	39	3	1	1	1	2	2	2	1	13	2	0	1	1	1	2	2	0	0	0	0	1	0		1	2		0	0		0		1	0	1	0	0	0	1		1	1	3	1	5		1		2
215	28	1	2	1	0	2	2	2	1	19	3	0	0	0	0	0	2	0	1	5	1	1	0		1	4		0	0		0		0	0	1	1	0	0	1		1	1	2	1	5		1		3
186	53	1	2	2	0	2	2	2	1	18	2	0	0	0	0	0	2	1	0	0	0	1	0		1	3		0	0		0		0	0	1	0	0	0	0		1	1	1	2	4		3		6
185	28	2	1	2	0	2	2	2	1	18	2	0	0	0	0	0	1	0	0	0	0	1	0		2	1		0	0		0		0	1	1	1	0	0	0		1	1	2	1	5		4		6
393	21	1	2	1	0	2	2	1	1	19	2	0	0	0	0	0	2	1	0	0	0	1	0		1	1		0	0		0		1	1	1	1	0	0	1		1	1	3	1	1		1		4
325	39	2	2	2	0	2	2	2	2	17	2	0	0	0	0	0	3	0	1	5	0	1			1	0		1	1		2		0	1	1	0	1	1	1		1	1	1	1	1		1		5
153	40	2	2	1	0	2	2	2	1	14	3	0	0	0	0	0	2	0	1	2	0	1	0		1	1		0	0		0		1	1	1	1	0	0	1		1	1	3	1	2		5		4
125	24	1	1	1	0	2	2	2	1	18	0	0	0	0	0	0	4	0	1	2	0	1	0		1	1		0	0		0		1	1	1	0	1	0	1		1	1	2	1	1		5		4
378	23	1	1	1	0	2	2	1	1	18	2	0	0	0	0	0	2	0	1	4	1	1	0		1	1		0	0		0		1	1	1	1	1	0	0		1	1	2	2	1		3		5
54	31	1	2	1	0	2	2	2	1	16	2	0	0	0	0	0	2	0	1	5	1	1	0		1	1		0	0		0		1	0	1	1	1	0	1		1	1	1	1	5		1		5
239	22	1	1	2	0	2	2	1	1	15	1	0	0	0	0	0	4	0	1	5	0	1	0		1	1		0	0		0		0	0	1	0	1	0	1		1	1	2	1	1		2		6
287	25	1	4	2	0	2	2	2	1	18	1	0	0	0	0	0	4	1	0	0	0	1	0		1	0		0	0		0		1	1	1	1	1	0	1		1	1	2	2	1		1		6
351	24	1	3	2	0	2	2	2	2	17	2	0	0	0	0	0	1	1	1	3	1	1	0		1	1		1	1		1		0	0	1	1	0	0	1		1	1	0	2	5		1		6
42	27	1	1	1	0	2	2	1	1	20	2	0	0	0	0	0	1	1	1	2	0	1	0		1	4		0	0		0		0	1	1	1	1	0	1		1	1	0	1	1		1		4
283	36	1	1	1	0	2	2	2	2	18	2	1	0	0	0	0	1	0	1	7	0	1	0		2	3		0	0		0		1	1	1	1	1	1	1		1	0	2	1	5		1		2
19	43	2	3	1	0	2	2	2	1	19	2	0	0	0	0	0	1	0	1	3	0	1	0		2	3		1	2		1		0	0	0	0	0	0	0		0	1	0	2	4		1		3
373	28	2	2	1	0	2	2	2	1	17	2	0	0	0	0	0	1	0	0	0	0	1	0		1	2		0	0		0		0	0	1	1	0	0	0		1	1	2	1	1		1		2
101	30	1	2	1	0	2	2	1	1	18	2	0	0	0	0	0	2	0	1	4	0	1	0		1	4		0	0		0		1	0	1	0	0	0	1		1	1	3	1	5		1		5
253	21	1	2	1	0	2	2	1	1	17	2	1	0	0	0	0	2	1	0	0	0	0	4		0	0		0	0		0		1	1	1	0	0	1	0		1	1	4	2	2		3		5
391	34	2	1	1	0	1	2	1	1	18	3	0	0	0	0	0	3	0	1	5	0	1	0		1	1		1	2		1		1	1	1	1	1	1	1		1	1	2	1	1		1		4
25	21	2	1	1	0	2	2	1	1	19	2	0	0	0	0	0	1	0	0	0	0	1	0		3	3		0	0		0		1	1	1	1	1	1	0		1	1	1	1	2		1		4
143	21	2	2	2	0	2	2	2	2	19	2	0	0	0	0	0	4	1	1	5	0	1	0		1	2		1	2		1		0	1	0	0	0	0	1		1	1	0	2	4		4		5
359	26	1	3	1	0	2	2	1	1	21	1	0	0	0	0	0	3	0	0	0	0	1	0		1	1		0	0		0		0	1	1	1	0	0	0		1	1	0	1	5		1		5
15	28	1	3	1	0	2	2	2	2	19	2	0	0	0	0	0	1	1	1	5	1	1	0		1	1		0	0		0		1	1	1	1	1	0	1		1	1	2	1	4		2		5
57	35	1	2	1	0	2	2	1	2	20	3	0	0	0	1	1	1	0	1	2	0	1	0		1	1		1	2		1		1	1	1	1	0	0	0		1	1	3	1	4		1		2
217	23	1	2	2	0	2	2	1	1	18	3	0	0	0	0	0	1	0	1	5	1	1	0		2	4		1	2		3		1	1	1	1	1	0	1		1	1	3	1	1		2		5
193	43	2	1	2	0	2	2	2	1	18	2	0	0	0	0	0	1	0	1	3	0	1	0		3	0		0	0		0		1	1	1	0	1	0	0		1	1	3	2	5		1		5
10	23	1	1	1	0	2	2	1	1	16	2	0	0	0	0	0	4	1	1	5	0	1	0		1	1		0	0		0		1	1	1	0	0	1	0		1	1	3	1	2		1		2
364	27	1	2	1	0	2	2	2	1	18	2	0	0	0	0	0	2	0	1	4	0	1	0		1	1		0	0		0		1	1	1	1	1	1	1		1	1	3	1	5		1		5
238	21	1	3	1	0	2	2	1	1	16	2	0	0	0	0	0	1	0	1	5	0	1	0		1	1		0	0		0		1	1	1	0	1	0	1		1	1	2	1	1		4		3
387	34	1	2	2	0	2	2	1	2	19	2	0	1	1	1	2	1	0	1	6	0	1	0		1	1		0	0		0		1	1	1	1	1	0	1		1	1	3	1	5		1		5
210	26	1	3	1	0	2	2	1	1	16	2	0	0	0	0	0	1	0	1	5	1	1	0		1	0		0	0		0		1	1	1	1	1	0	0		1	1	4	1	5		1		3
76	33	1	2	2	0	2	2	2	1	24	2	0	1	1	1	2	2	1	1	2	1	1	0		2	3		1	1		1		0	1	1	0	1	0	0		1	1	3	1	5		1		2
270	40	1	2	1	0	2	2	1	1	20	1	0	0	0	0	0	4	1	0	0	0	1	0		1	1		0	0		0		1	1	1	1	0	0	0		1	1	2	1	5		1		6
179	29	2	2	1	0	2	2	1	1	17	2	0	0	0	0	0	1	0	1	3	0	1	0		1	3		0	0		0		0	1	1	1	0	0	1		1	1	2	1	2		0	Friend	5
159	23	1	2	1	0	2	2	2	1	15	2	1	0	0	0	0	1	0	0	0	0	1	0		1	2		1	2		1		0	1	1	1	0	0	1		1	1	3	2	1		3		4
181	28	1	2	2	0	2	2	1	1	16	2	0	0	0	0	0	1	0	1	6	1	1	0		2	1		0	0		0		1	1	1	1	1	0	1		1	1	2	1	5		1		5
88	29	1	3	2	0	2	2	2	1	19	2	0	0	0	0	0	1	1	0	0	0	1	0		1	1		0	0		0		1	0	1	0	0	0	1		1	1	2	2	5		1		4
335	34	3	3	2	1	2	3	2	1	19	2	0	0	0	0	0	2	0	1	3	1	1	0		2	1		0	0		0		1	0	1	0	0	0	1		1	1	4	2	5		1		6
84	22	1	4	2	0	2	3	2	1	19	2	0	0	0	0	0	4	1	0	0	0	0	5		0	1		0					1	0	1	0	1	1	1		1	1	2	1	5		1		6
237	29	2	1	1	0	2	3	2	1	14	2	1	0	0	0	0	1	0	1	7	0	1	0		1	0		0	0		0		1	1	1	1	1	0	1		1	1	3	1	5		1		5
155	28	1	3	1	0	2	3	1	1	21	3	0	0	0	0	0	2	1	0	0	0	1	0		1	0		0	0		0		1	0	1	1	1	1	0		1	1	1	1	1		1		4
171	45	2	3	2	1	2	3	2	1	22	2	0	0	0	0	0	1	0	0	0	0	1	0		1	1		0	0		0		1	1	1	1	1	0	1		1	1	2	1	1		1		6
306	29	1	2	1	0	2	3	2	2	19	2	0	0	0	0	0	1	1	1	5	0	1	0		1	1		1	1		2		1	1	1	1	1	0	1		1	1	3	1	5		1		5
140	24	1	3	1	1	2	3	1	1	18	1	0	0	0	0	0	4	1	1	2	1	1	0		2	1		0	0		0		0	1	0	0	0	0	0		1	1	0	2	1		5		4
251	24	1	2	1	0	2	3	1	1	18	2	0	0	0	0	0	3	0	1	2	0	1	0		2	1		0	0		0		0	1	1	1	1	0	0		1	0	0	1	2		1		2
262	37	2	3	1	0	2	3	2	1	18	2	0	0	0	0	0	2	0	1	3	0	1	0		1	1		0	0		0		0	0	1	1	1	0	1		1	1	2	1	1		5		4
116	28	1	4	2	1	2	3	1	2	18	2	0	0	0	0	0	3	1	1	5	0	1	0		1	1		0	0		0		0	1	0	0	0	0	0		1	1	0	1	3		1		6
63	47	1	2	1	0	2	3	2	2	18	2	0	1	1	1	2	1	0	1	1	0	1	0		1	0		0	0		0		1	1	1	1	1	1	1		1	1	3	1	4		1		2
162	33	1	4	2	0	2	3	2	2	20	2	0	0	0	0	0	2	0	1	2	0	1	0		3	3		0	0		0		1	1	1	1	1	1	1		1	1	2	1	1		1		5
61	36	1	4	1	0	2	3	1	3	17	3	0	0	0	0	0	3	1	1	2	0	1	0		3	3		0	0		0		1	0	1	1	0	0	1		1	1	0	1	5		1		1
151	22	1	2	1	0	2	3	2	1	17	2	0	1	1	1	2	3	0	1	2	0	0	5		0	1		0	0		0		1	1	1	1	0	0	1		1	1	0	2	2		4		6
338	39	3	1	1	1	2	3	2	1	18	2	0	0	0	0	0	2	1	1	4	0	1	0		3	1		0	0		0		1	1	1	1	1	1	0		1	1	1	2	5		1		5
313	28	1	3	2	0	2	3	1	1	19	2	0	0	0	0	1	1	1	0	0	0	1	0		3	1		0	0		0		1	1	1	1	1	0	1		1	1	1	1	2		2		5
180	37	1	2	1	0	2	0	1	1	18	2	0	0	0	0	0	2	0	1	5	1	1	0		1	1		0	0		0		1	1	1	1	1	0	1		1	1	3	2	2		1		1
293	25	1	2	1	0	2	3	2	1	19	1	0	0	0	0	0	4	0	1	3	0	1	0		0	0		0	0		0		1	0	1	1	1	1	1		1	1	3	1	1		5		4
50	28	2	2	1	0	2	0	2	1	17	3	0	0	0	0	0	4	1	1	4	0	1	0		1	0		0	0		0		0	1	1	1	0	0	1		1	1	0	1	5		1		5
5	32	1	2	1	0	2	3	1	1	17	3	0	1	1	1	2	1	1	0	0	0	1	0		2	2		0	0		0		1	1	1	1	1	0	0		1	1	1	2	1		1		3
221	23	1	2	2	1	2	3	1	1	17	3	1	1	1	1	1	1	0	1	2	1	1	0		1	1		0	0		0		1	0	1	0	0	1	0		1	1	0	2	5		3		6
46	27	1	1	1	0	2	0	1	1	18	2	0	0	0	0	0	1	1	0	0	0	1	0		2	0		0	0		0		1	1	1	1	1	0	1		1	1	1	1	1		2		4
219	32	1	3	2	1	2	3	1	1	13	2	0	0	0	0	0	3	0	1	4	0	1	0		3	0		0	0		0		0	1	1	1	1	0	1		1	0	0	1	5		2		5
34	28	1	2	1	0	2	0	1	1	17	2	0	0	0	0	0	1	1	0	0	0	1	0		1	0		0	0		0		1	1	1	1	1	1	1		1	1	2	1	1		1		4
395	31	1	1	1	0	2	3	1	1	17	1	0	0	0	0	0	4	0	1	3	0	1	0		1	1		0	0		0		1	1	1	0	1	0	1		1	1	1	1	1		1		5
130	31	1	2	1	0	2	0	1	1	16	2	0	1	1	0	0	2	1	0	0	0	1	0		3	1		0	0		0		1	1	1	1	0	0	1		1	1	1	1	1		3		2
1	25	1	2	2	0	2	3	1	2	14	2	0	0	0	0	0	4	0	1	7	0	1	0		1	1		0	0		0		0	1	1	1	0	1	0		1	1	1	1	1		1		6
206	29	1	2	1	0	2	3	1	1	18	2	0	0	0	0	0	4	0	0	0	0	1	0		1	0		0	0		0		0	0	1	1	1	1	1		1	1	0	2	3		4		4
288	23	1	1	1	0	2	3	1	1	18	1	0	0	0	0	0	1	0	1	2	0	1	0		1	1		0	0		0		1	1	1	1	1	1	1		1	1	0	2	5		3		5
331	36	3	1	2	0	2	3	2	2	17	3	0	0	0	0	0	1	0	1	4	0	1	0		2	0		0	0		0		1	1	1	0	0	0	1		1	0	0	2	5		1		5
149	28	1	2	2	0	2	3	2	1	20	2	0	0	0	0	0	2	1	0	0	0	1	0		3	1		0	0		0		0	1	1	1	0	1	1		1	1	1	2	5		1		1
317	23	1	2	1	0	2	3	2	1	18	2	0	0	0	0	0	2	1	1	5	0	1	0		1	1		0	0		0		1	1	1	1	1	0	1		1	1	2	1	4		1		4
243	22	1	2	1	0	2	3	2	1	18	2	0	1	1	1	1	1	1	1	5	0	1	0		2	0		0	0		0		1	0	1	0	0	1	0		1	1	3	2	5		1		4
292	24	1	4	2	0	2	0	1	1		1	0	0	0	0	0	1	0	1	3	0	0	2		0	0		0	0		0		1	0	1	1	1	1	1		1	1	3	1	5		4		6
26	22	1	4	2	0	2	0	1	1	17	2	0	0	0	0	0	4	0	1	1	0	1	0		3	1		0	0		0		1	1	1	1	1	0	0		1	1	2	1	5		1		4
247	29	1	2	1	0	2	0	1	1	17	3	0	0	0	0	0	1	1	1	6	1	1	0		2	0		0	0		0		1	1	1	0	0	1	1		1	1	4	1	5		1		3
96	29	1	2	1	0	1	3	2	1	14	3	0	1	2	1	1	1	1	1	3	0	1	0		2	1		0	0		0		1	1	1	1	0	0	1		1	1	2	1	1		1		4
275	55	2	1	1	0	2	3	1	1	20	2	0	0	0	0	0	1	0	0	0	0	1	0		1	1		0	0		0		0	0	1	1	1	0	1		1	1	3	1	3		1		3
302	45	2	2	2	0	2	3	2	1	16	2	0	0	0	0	0	1	0	1	2	0	1	0		1	1		1	1		1		0	1	1	1	1	1	1		1	1	3	1	1		1		1
160	31	3	2	1	0	2	3	1	1	20	2	0	0	0	0	0	3	1	0	0	0	1			3	1		0	0		0		0	1	1	0	1	0	0		1	1		2	1		0	Friend	3
271	36	2	3	1	1	2	3	2	1	18	3	1	0	0	0	0	1	0	1	5	0	1	0		2	1		0	0		0		0	0	1	1	0	0	1		1	1	0	1	1		1		5
90	28	1	2	1	0	2	3	1	1	15	1	0	0	0	0	0	3	1	1	5	0	1	0		1	0		0	0		0		1	0	1	1	1	0	1		1	1	2	1	5		1		6
235	29	1	2	1	0	2	3	2	1	17	2	1	0	0	0	0	4	1	1	0	0	1	0		1	0		0	0		0		0	1	1	0	1	0	1		1	1	3	1	5		1		6
20	40	2	1	1	0	2	3	1	1	18	2	0	0	0	0	0	1	1	1	2	0	1	0		1	1		1	1		1		1	0	1	0	0	1	1		1	1	0	1	5		0	Partner	3
341	31	1	1	2	0	2	3	2	1	17	2	0	0	0	0	0	2	1	1	7	0	1	0		2	0		1	1		1		1	0	1	0	0	0	1		1	1	4	2	2		1		2
175	25	1	2	1	0	2	3	1	1	20	3	0	0	0	0	0	2	0	0	0	0	1	0		2	1		0	0		0		0	1	1	1	0	0	1		1	1	0	1	1		3		2
23	28	1	2	1	0	2	3	2	1	15	2	1	0	0	0	0	4	1	0	0	0	1	0		1	1		0	0		0		1	1	1	1	1	0	1		1	1	0	1	1		1		6
124	34	1	4	2	0	2	3	2	1	30	2	1	0	0	0	0	2	1	1	3	0	1	0		1	1		0	0		0		1	0	1	1	1	0	1		1	1	3	1	1		1		3
208	32	1	2	2	1	2	3	2	3	17	2	0	0	0	0	0	1	0	0	0	0	1	0		3	0		0	0		0		0	0	0	0	0	0	1		1	1	3	1	5		1		2
97	25	1	2	1	0	2	3	2	1	18	2	0	0	0	0	0	3	0	1	4	1	1	0		1	1		0	0		0		1	1	1	1	1	0	0		1	1	2	1	1		3		3
173	35	1	4	2	0	2	3	2	1	16	1	0	0	0	0	0	4	0	0	2	0	1	0		3	0		0	0		0		1	1	1	1	1	0	1		1	1	2	1	5		1		5
333	23	1	3	1	0	2	3	1	1	18	2	0	0	0	0	0	2	0	0	0	0	1	0		3	0		0	0		0		1	0	1	0	0	0	1		1	1	3	2	5		1		4
128	22	1	2	1	0	2	3	1	1	16	2	0	0	0	0	0	2	1	1	7	1	1	0		1	1		1	1		5		1	0	1	1	1	0	1		1	1	1	1	1		3		5
104	21	1	1	1	0	2	3	1	2	16	3	0	0	0	0	0	2	1	1	5	1	1	0		1	3		0	0		0		1	1	1	1	1	1	0		1	1	2	1	1		3		2
69	38	1	2	1	0	2	3	1	3	15	2	1	0	0	0	0	1	0	1	7	0	1	0		2	3		1	1		1		1	1	1	1	1	1	1		1	1	4	1	5		1		5
56	28	1	1	1	0	2	3	1	1	17	2	0	0	0	0	0	4	0	1	2	0	0	5		0	4		0	0		0		1	1	1	1	1	0	1		1	1	2	1	2		0	Friend	3
107	36	1	2	1	0	2	3	2	2	18	2	0	0	0	0	0	2	0	1	4	0	1	0		3	2		1	3		1		0	1	1	1	0	0	0		1	1	2	1	1		1		5
11	38	1	2	1	0	2	3	2	1	18	1	0	0	0	0	0	4	1	1	7	0	1	0		1	2		0	0		0		1	1	1	0	1	0	1		1	1	0	1	5		1		6
370	50	3	1	2	0	2	3	2	1	17	1	0	0	0	0	0	4	1	1	3	0	1	0		2	1		0	0		0		1	0	1	1	1	0	0		1	1	2	2	5		1		6
397	36	1	2	1	0	2	3	2	1	20	2	0	0	0	0	0	4	0	1	3	0	0	3		0	1		0	0		0		0	1	1	0	1	0	1		1	1	2	1	1		2		3
80	24	1	2	1	0	2	3	2	1	15	2	0	0	0	0	0	1	0	1	3	0	1	0		3	0		0	0		0		1	1	1	1	1	1	1		1	1	2	2	1		1		3
280	34	1	2	1	0	2	3	2	1	17	1	0	0	0	0	0	4	1	0	0	0	1	0		3	1		0	0		0		1	1	1	1	1	1	1		1	1	3	1	5		1		6
77	38	2	2	2	0	2	3	1	1	18	2	0	0	0	0	0	1	0	1	4	0	1	0		1	1		1	3		1		1	1	0	1	1	0	0		1	1	4	1	1		1		6
129	44	3	3	1	1	2	3	2	1	18	2	1	0	0	0	0	2	1	1	2	0	1	0		2	0		0	0		0		0	1	1	0	0	0	0		1	1	0	2	5		1		6
79	44	1	2	1	0	2	3	2	3	16	4	0	0	0	0	0	1	1	1	7	0	1	0		1	1		0	0		0		1	1	1	1	1	1	1		1	1	4	1	3		1		4
164	34	2	2	2	1	2	3	2	1	20	1	0	0	0	0	0	4	0	1	3	0	1	0		2	0		0	0		0		1	1	1	1	1	0	1		1	1	1	2	2		1		6
187	40	2	2	2	0	2	3	2	1	16	2	0	0	0	0	0	1	0	1	3	0	1	0		3	1		0	0		0		0	1	1	1	0	0	0		1	1	2	1	5		1		6
220	35	1	3	2	0	2	3	1	1	18	3	0	0	0	0	0	2	1	1	6	0	1	0		2	1		0	0		0		1	1	1	1	1	0	1		1	1	2	1	5		1		5
191	33	2	1	1	0	2	3	2	1	20	2	0	0	0	0	0	1	0	1	2	0	1	0		3	0		0	0		0		0	0	1	1	1	1	1		1	1	0	2	5		1		6
244	37	2	4	2	1	2	3	2	1	21	1	0	0	0	0	1	1	0	1	4	0	1	0		2	0		0	0		0		0	1	1	1	1	0	1		1	0	0	1	5		1		5
346	42	3	1	2	0	2	3	2	1	20	1	0	0	0	0	0	4	0	0	0	0	1	0		3	0		0	0		0		0	0	1	0	1	0	0		1	1	2	2	5		1		5
150	22	1	2	1	0	2	3	2	1	17	1	1	1	2	1	1	1	0	0	0	0	0	2		1	0		0	0		0		0	1	0	0	0	0	0		1	1	0	2	5		1		6
131	33	1	2	2	0	2	3	1	3	16	2	1	0	0	0	0	2	0	1	4	0	1	0		1	0		0	0		0		1	1	1	0	0	0	0		1	0	0	2	5		1		6
[truncated: 21 more columns]
